# Supplementary material for: Fine-Scale hydrodynamic modelling of Lake Ontario: Has climate change affected circulation patterns?
Source: Research Square preprint supplement (doi:10.21203/rs.3.rs-3296977/v2), 2024-02-01
Supplement: Supplementary file 1 [file 6291b8a42dacc93914abdf5b.xlsx]

## Sheet: CalParRangeCalcs
		This worksheet provides a series of calculations used to obtain the range of calibration-parameter values
		for use with the MIKE3 model:
		I. Hydrodynamic Relationships:
		(a) bed resistance: (based on Pages 39 to 40 from the "MIKE_FM_HD_2D.pdf" document)									Estimate roughness range of ks for calibration:
											Par	Range of values from Delft3d (Lake Huron)
		cf = g / C2		Eq 6.7		where:	cf = drag coefficient					Min	Best	Max
		cf = g / (M*h1/6)2		Eq 6.8			g = gravitational constant (m/s2)				n	0.02	0.0275	0.03	0.03125	0.05	0.025
											M	50	36.3636	33.3333	32	20	40
		M = 25.4 / ks1/6		Eq 6.9 *			C = Chezy coefficient (s/m1/2)				ks (m)	0.0171863	0.116144	0.195763	0.250094	4.19587	0.0655605
		M = 1 / n					M = Manning's number (m1/3/s)
											Suggested calibration-run values for ks:
							n = Manning's coefficient (s/m1/3)
											ks (m)	0.01	0.05	0.25
							h = total water depth (m)				n	0.018274	0.0238962	0.0312481
							ks = roughness height (m) (Nikuradse)						base
				* Note: the units in the numerator (25.4) are in: m1/2/s							Values used in Lake Erie (2007 data) MIKE3 application:
												Min	Best	Max
			relationship between: "n" (as used by Delft3d) and "ks" (as used by Mike3) is:
											ks (m)	0.01	0.01	0.2
					ks = { 25.4 * n }6
						Ks	n
				or:	n = ks1/6/ 25.4	0.05	0.0238962
					M = 25.4/k1/6
		(b) Wind drag coefficient:
			i) variable with wind speed:
			Values from Delft3d (Lake Huron 2003 data)					Values recommended in Mike3 (for open sea winds):
			Wind speed (m/s)		0	10		Wind speed (m/s)		7	25
				cd	0.0025	0.003			cd	0.001255	0.002425
			Suggested calibration-run values for cd:					Values from MIKE3 (Lake Erie 2007 data)
										Min	Max
			Wind speed (m/s)		0	20		Overall range in sensitivity sims		0.001	0.0036
			1		0.0015	0.0025
			2		0.002	0.003		Wind speed (m/s)		0	20
			3		0.003	0.0036		Final calibrated	cd	0.0015	0.0025
			4		0.0015	0.0036
			ii) constant with wind speed:
			Case		cd
			1		0.0015
			2		0.0025	base
			3		0.0035
		(c ) Wind speed reductions owing to vertical air turbulence / boundary layer effects over lake:
			Suggested calibration-run values for wind-reductions:
			Wind Reduction Cases:			NONE	2	2p	3
						base
		(d ) Eddy Viscosity:		Use the mixed viscosity option: 2-d Smagorinsky for Horizontal; 1-d k-Є for vertical
				(see Section 6.20 of: "m3HD.pdf")
				"It is noted, that the parameters entering the 1D (vertical) k-ε model are
				often considered as “universal”. The value for Csm, the horizontal Smagorinsky
				coefficient is, however, used as a calibration parameter,…"
			i) horizontal viscosity:
			Use the Smagorinsky method:
			suggested range for the Smagorinsky coefficient, CS = 0.25 to 1.0						(this is considered a calibration parameter - see note in red above)
				Cs calibration-run values:			0.25	0.5	1
								base
			ii) vertical viscosity:
			Use the k-Є method:		(no calibration recommended, see note in red above)
			iii) Selection of MINIMUM and MAXIMUM eddy viscosity limits:
			(see Pg 91 of "m3HD.pdf)								Viscosity:	Minimum values:
			" 6.11.3 Specifying Limits for the Eddy Viscosity
			You should also specify the limits within which the eddy viscosity is								Horizontal:	1.6e-06	m2/s
			allowed to vary in each grid direction. It is recommended that the value of								Vertical:	1.8e-06	m2/s
			the dimensionless eddy viscosity, "E",
											Viscosity:	Maximum values:
			E = νT * Δt / (Δs)2		(6.13)	(or rearranged for vT) :		vT = E * (Δs)2 / Δt				model grid time step		60	(seconds)
											Horizontal: (est using vT version of Eq. 6.13;
			does not exceed 10 in any of the three directions. For applications using								and approx range of Δs from the whole
			the mixed 1D k-ε, 2D Smagorinsky turbulence model, the eddy viscosity								lake model; specific to the max Δt for the grid):
			in the vertical direction is, however, allowed values up to approximately
			90Δz2/Δt.								Water surface area (m2)		19529000000
											Number of segments		10707
			A minimum value for the eddy viscosity can be chosen to zero, but more
			useful is a value in the order of the molecular viscosity 1.6·10-6 m2/s.								approx. Δs (m):	Min	Ave*	Max
			When applying k-ε models, it is recommended you use minimum values								*(area / #segs)	100	1350.54	3500
			which fulfil the Kolmogorov/Prandtl relation, i.e. kmin=10-7 m2/s2 and
			εmin=5·10-10 m2/s3, yielding νT,min=1.8·10-6 m2/s. "								Δs range:	E	Δs (m)	Δt (s)	vT (m2/s)
											Min	1	100	60	166.667
											Ave	1	591.608	60	5833.33
											Max	1	3500	60	204167
			Summary of eddy viscosity (m2/s) LIMITS:								Min	1	100	60	166.667
				Minimum	Maximum						Ave	1	591.608	60	5833.33
			Horizontal:	1.6e-06	204167						Max	1	3500	60	204167
			Vertical:	1.8e-06	11.76
											Vertical: using: "90*Δz2 / Δt":		a) UPPER: σ-layer, (m):		40		Vertical: using: "90*Δz2 / Δt ":		b) LOWER: fixed layer section:
			UPDATE THE MAXIMUM LIMITS AS SHOWN BELOW
											Approximate range in:		min	max	nearshore		Approximate range in:		min	max
											Water Depth, "D", (m):		1	40	5		Water Depth, "D", (m):		2	15
			Horizontal: (use length-based disp coef, with mesh's characteristic length)								Layer thickness, (%D):		3	7			Layer thickness, (%D):		100	100
			Ex = 2.2e-4 * L 1.3		assume these are NOT calibrated, (Cs is already)
			Mesh:					Length (m)	Ex (m2/s)			depth (m)	Δz (m)	Δt (s)	vvert (m2/s)			depth (m)	Δz (m)	Δt (s)	vvert (m2/s)
			Minimum characteristic element length					100	0.0875836			1	0.03	60	0.00135			2	2	60	6
			Maximum characteristic element length					5000	14.1607			1	0.07	60	0.00735			2	2	60	6
												40	1.2	60	2.16			15	15	60	337.5
												40	2.8	60	11.76			15	15	60	337.5
			Vertical:	(using k - ε equation:		νt = cμ * k2 / ε )	νt = Turbulent viscosity ε = turbulent dissipation rate	k = turbulent kinetic energy Cμ = constant	0.09			5	0.15	60	0.03375			0	0	60	0
			Max	νt (m2/s)	k (m2/s2)	ε (m2/s3)	Ratio of: k / vt	νt (m2/s) calculated				5	0.35	60	0.18375			0	0	60	0
				0.001	4.2e-05	1.6e-07	0.042	0.00099225
				0.0001	4.2e-06	1.6e-08	0.042				Option:	1	2
				1e-05	4.2e-07	1.6e-09	0.042				Assign:	k, ε	vt, k
											Calculate:	vt	ε
			NOTE: when setting the maximum limits for vt (equivalent to vvert), k and ε; the equation								cμ	0.09	0.09
			above, along with the k/vt ratio, should be satisfied.								vt (m2/s)	1	1
			The equation is programmed for 2 options in Cells (L113:N119).								k (m2/s2)	0.042	0.042
											ε (m2/s3)	0.00015876	0.00015876
			UPPER Viscosity limit , (m2/s):
				Lowest			Highest
			Horizontal:	1	10	100	1000
			Vertical:
			vt (m2/s)	0.1	1	10	100
			k (m2/s2)	0.0042	0.042	0.42	4.2
			ε (m2/s3)	1.5876e-05	0.00015876	0.0015876	0.015876
					base
		II. Energy Flux Relationships:
		(a) Vaporative heat loss (or latent flux):				(see Eq 2.103 from "MIKE_321_FM_Scientific_Doc.pdf")
			Coefficients "a1" and "b1" are set by user; default values are 0.5 and 0.9, respectively
			(could not find this equation in other sources, as such a "blind" calibration, based on the default values is used)
			Estimated value range is:
					-25%	+25%
			a1	0.5	0.35	0.65
			b1	0.9	0.65	1.15
				base
		(b) Short-wave radiation under cloudy skies:					(see Eq 2.115 from "MIKE_321_FM_Scientific_Doc.pdf")
			i) Coefficients "a2" and "b2" are set by user; default values are 0.295 and 0.371, respectively
			These coefficients were estimated for Lake Ontario during the January 1 to December 31, 2008 time period
			as outlined in: "Clearness_AllStns_20062011.xls" workbook; "HourlyEqs" worksheet; (columns A through S)
			and assumed to be the base values for sensitivity analysis / calibration purposes:
			Estimated value range is:
			a2	0.189	0.1	0.3
			b2	0.595	0.35	0.85
				base
			Assume a calibration based on relative difference with MIKE default values:
			ii) Hour angle ωi equation:			(see Eq 2.120 from "MIKE_321_FM_Scientific_Doc.pdf")
			There are 2 user defined parameters for this equation (these are NOT considered calibration coefficients):
				LE = the local longitude (default value = 0)
					Value used:		-78
				"ΔT displacement" or, referred elsewhere as: "correction for summer time (hours)" (default value = 0)
					Value used:		0
		(c) Light attenuation into water column, using modified Beer's Law:							(see Eq 2.99 from "MIKE_321_FM_Scientific_Doc.pdf")
			Coefficients "β" and "λ" are assigned by the user; default value range is: "β" : 0.2 to 0.6; and "λ" : 0.5 to 1.4 m-1
			Based on review of other Lake Ontario papers:
				β	not found
				λ	0.15 to 1.2 m-1
			Estimated value range is:
			β	0.3	0.15	0.6
			λ	0.3	0.15	0.6
				base
		Sensitivity Simulation Runs
		(STEP A) Boundary friction parameters
	OVERALL	STEP	Sensitivity		Parameter value:
	Sim RUN	Run	Description		Bottom friction	Wind friction coefficient
					height, "ks":	wind speed (m/s) for:		drag coefficient for:
	NUMBER	Number			(m)	lower	upper	lower	upper
	SA_BASE		Base case (all)		0.05	0.0025	na	na	na
	1	1	lower ks		0.01	0.0025	na	na	na
	2	2	upper ks		0.25	0.0025	na	na	na
	3	3	lower cd		0.05	0.0015	na	na	na
	4	4	upper cd		0.05	0.0035	na	na	na
		(STEP B) Viscosity parameters
	OVERALL	STEP	Sensitivity		Parameter value:
	Sim RUN	Run	Description		Horizontal viscosity (Ex) (m2/s)			Vertical viscosity - Maximum:			Vertical viscosity - Minimum:
	NUMBER	Number			Cs	Ex Max	Ex Min	vt (m2/s)	k (m2/s2)	ε (m2/s3)	vt (m2/s)	k (m2/s2)	ε (m2/s3)
	SA_BASE		Base case (all)		0.5	10	1.6e-06	1	0.042	0.000159	1.8e-06	1e-07	5e-10
	1	1	upper horizontal vis		1	100	1.6e-06	1	0.042	0.000159	1.8e-06	1e-07	5e-10
	2	2	lower horizontal vis		0.25	1	1.6e-06	1	0.042	0.000159	1.8e-06	1e-07	5e-10
	3	3	upper vertical vis		0.5	10	1.6e-06	10	0.42	0.00159	1.8e-06	1e-07	5e-10
	4	4	lower vertical vis		0.5	10	1.6e-06	0.1	0.0042	1.59e-05	1.8e-06	1e-07	5e-10
		(STEP C) Energy Flux parameters
	OVERALL	Simulation	Sensitivity		Parameter value:						Dispersion of temp. Transport:
	Sim RUN	Run	Description		Vaporative heat-loss:		Short-wave cloudy:		Light attenuation:		Scale factor: (ratio of eddy vis):
	NUMBER	Number			a1	b1	a2	b2	β	λ	Horizontal	vertical
	SA_BASE	{as above}	Base case (all)		0.5	0.9	0.189	0.595	0.3	0.3	1	1
	1	1	Vaporative heat-loss		0.35	0.9	0.189	0.595	0.3	0.3	1	1
	2	2			0.65	0.9	0.189	0.595	0.3	0.3	1	1
	3	3			0.5	0.65	0.189	0.595	0.3	0.3	1	1
	4	4			0.5	1.15	0.189	0.595	0.3	0.3	1	1
	5	5	Short-wave cloudy		0.5	0.9	0.1	0.595	0.3	0.3	1	1
	6	6			0.5	0.9	0.3	0.595	0.3	0.3	1	1
	7	7			0.5	0.9	0.189	0.35	0.3	0.3	1	1
	8	8			0.5	0.9	0.189	0.85	0.3	0.3	1	1
	9	9	Light attenuation		0.5	0.9	0.189	0.595	0.15	0.3	1	1
	10	10			0.5	0.9	0.189	0.595	0.6	0.3	1	1
	11	11			0.5	0.9	0.189	0.595	0.3	0.15	1	1
	12	12			0.5	0.9	0.189	0.595	0.3	0.6	1	1
	13	13	Dispersion factor		0.5	0.9	0.189	0.595	0.3	0.3	0.5	1
	14	14			0.5	0.9	0.189	0.595	0.3	0.3	1.5	1
	15	15			0.5	0.9	0.189	0.595	0.3	0.3	1	0.5
	16	16			0.5	0.9	0.189	0.595	0.3	0.3	1	1.5
		II. CONTAMINANT TRANSPORT:
		Dispersion coefficients are the main parameters that need to be calibrated.
		(1) Vertical: assume that the same proportionality factor can be used for contaminant transport dispersion
		as used for temperature, (i.e. proportional to the vertical eddy viscosity, using the same scale factor).
		(2) Horizontal: There are two basic approaches possible:
		(a) a scale factor proportional to the horizontal eddy viscosity, (however, this becomes essentially
		a calibration process, since dispersion is also related to the size of the lateral mesh and time steps).
		(b) proportional to velocity components or current speed (see Pg 27 of MIKE 3 - Environmental Hydraulics manual).
		(Again, this will become a calibration process).
		Approach 2a:
		i) estimate approximate absolute dispersion coefficient, based on a typical length-scale approach.
									where:
									Ex	Dispersion coefficient (m2/s)
									x	Length scale (in metres)
									CC	0.000223
									CD	1.3
					x	Dx
					(km)	(m2/s)
					0.1	0.0887779
					0.2	0.218597
					0.5	0.719392
					1	1.77135
					2	4.36158
					5	14.3538
		ii) select the typical grid size of around 200 metres (in the vicinity of the Harbours); and apply Equation 4.5 (Pg 39 of MIKE3 - Env.Hydraulics Manual),
		to obtain an approximate range for the "dispersion coefficient":
			dj = δj * Δt / (Δsj)2		; where:	dj	dimensionLESS dispersion coefficient
						δj	dispersion coefficient (m2/s), in the "j-direction"
						Δt	time step size (s)
						Δsj	grid spacing (m), in the "j-direction".
			∑dj <	0.5	; for stability. (i.e. the sum of the 3-directional dimensionless dispersion coefficients)
		iii) calculations:
				EVV MAX	(the MAXIMUM Vertical Eddy Viscosity (m2/s))
				dV MAX	(the MAXIMUM Vertical Dimensionless Dispersion Coefficient)
				dH MAX	(the MAXIMUM Horizontal Dimensionless Dispersion Coefficient (for stability))
				EVH	(the simulated Horizontal Eddy Viscosity (m2/s) - in the vicinity of the selected mesh-size / harbour)
				DH	(the estimated Horizontal Dispersion factor (m2/s) - using the spatially-based equation above)
			Δt	Δsj	EVV MAX	dV MAX		DH	EVH (m2/s) :		Ratio:	Check stability req:		dH MAX	Conclusion:
			(s)	(m)	(m2/s)			(m2/s)	approx range	selected	DH / EVH	dH actual	*2 (for 2d)
			60	200	1.5	0.00225		0.218597	1 to 4	2	0.109298	0.000327895	0.00065579	0.248875	(should be stable)
			60	1000	1.5	9e-05		1.77135		20	0.0885676	0.000106281	0.000212562	0.249955	(should be stable)
			60	2000	1.5	2.25e-05		4.36158		25	0.174463	6.54237e-05	0.000130847	0.249989	(should be stable)
										geoave =	0.119087
				Overall, it appears that using a dispersion factor equal to about 0.12 (of the simulated horizontal eddy viscosity); should be reasonable.
		APPROXIMATE EQUATION FOR ESTIMATING MINIMUM TIME TO COMPLETE A BASIC HYDRODYNAMIC SIMULATION:
		Assume basic relationship:			Tsim = CNO * (tTOTAL/tsmax) * { NLAY * NHorCells }
				where:	Tsim	MINIMUM simulation time required (i.e. actual time required to complete simulation)
					CNO	a calibration factor to account for the combination of CPU used, numerical options selected, and mesh complexity.
					TTOTAL	total time to be simulated
					tsmax	maximum time-step size for CFL stability (from analysis of mesh in *.mdf file)
					NLAY	number of vertical layers in mesh
					NHorCells	number of horizontal cells in mesh
		Estimate CNO for various actual simulation results:																	FINAL USED FROM EQUATIONS 1 AND 2 IN THE REPORT:
															Length scales based on tsmax:
		Tsim	Number	Size output	TTOTAL	mdf file	mesh	tsmax	NLAY	NHorCells	CNO	TTOTAL / Tsim		CFL	Uave	LMINeff		Mesh		NHorCells	Nlayer	Lemin	tsmax	CNO	tTOTAL	Tsim			tTOTAL /
		(sec)	output steps	steps (sec)	(sec)		used	(sec)							(m/s)	(m)						(m)	using Eq2		(days)	(sec)	(days)	(hrs)	Tsim
																							(s)
		196044	198000	120	23760000	W001dii	LEWhole1	2006.3	10	3384	0.000489184	121.197		0.9	0.3	668.767		LE07		8052	10	5.7	0.2565	2.9e-06	365	2.87757e+07	332.282		1.09846
		420392	198000	120	23760000	W001diiN5a	LEWholeCBNested3OBs_5	155.8	10	2745	0.000100423	56.5187		0.9	0.3	51.9333		LE10		3394	10	420	18.9	2.9e-06	365	164611	1.90082		192.022
		111140	198000	120	23760000	W001diim	LEWhole1	2006.3	10	3384	0.000277325	213.784		0.9	0.3	668.767		LE10E01		140	10	6200	279	2.9e-06	365	459.973	0.00531147	0.127475	68719.2
																		LE10E02		522	10	6200	279	2.9e-06	365	1715.04	0.0198042	0.475301	18430.4
																		LEWhole1		3384	10	560	25.2	2.9e-06	365	123094	1.42141		256.787
																		LEWholeCBNested3OBs_5		2745	10	40	1.8	1.6e-06	365	771260	8.906		40.9836
																Length scales based on tsmax:							CFL	0.9
	TTOTAL	Number	Size output	TTOTAL	mdf file	mesh	tsmax	NLAY	NHorCells	CNO	Tsim			TTOTAL / Tsim		CFL	Uave	LMINeff					uc	20
	(days)	output steps	steps (sec)	(sec)		used	(sec)				seconds	hours	days				(m/s)	(m)
	275	198000	120	23760000	LE07	LE07	16.91	10	8052	0.00049	5.54374e+07	15399.3	641.636	0.428592		0.9	0.3	5.63667
	275	198000	120	23760000	LE07	LE07	16.91	10	8052	0.00028	3.16785e+07	8799.58	366.649	0.750035		0.9	0.3	5.63667
	275	198000	120	23760000	does not exist	LEWholeCBNested3OBs_5	155.8	10	8052	0.00049	6.01698e+06	1671.38	69.641	3.94882		0.9	0.3	51.9333
	275	198000	120	23760000	does not exist	LEWholeCBNested3OBs_5	155.8	10	8052	0.00028	3.43828e+06	955.077	39.7949	6.91044		0.9	0.3	51.9333
	365	262800	120	31536000	LE07	LE07	16.91	10	8052	0.00028	4.2046e+07	11679.4	486.644	0.750035		0.9	0.3	5.63667

## Sheet: RunDescription
	GENERAL DESCRIPTION OF SIMULATION RUN:
		(Module details are provided on subsequent worksheets in this workbook)
SIMULATION			MODULES SELECTED					Simulation control	General	Directory name
#	Number	Description	Hydrodynamic	Temperature	Waves	ECO Lab	Transport	file:	vertical	containing result files
				& Salinity			Module		structure
	LO_HD_2018_WGS84_1	AS above + the CFSR meteo files to be created as equidistant with the New mikeio API Jan5 → Dec31	yes	yes				LOnt_Enh_NW_Opt_V3_WGS84_C#.mesh	Dual: (σ - z)	LO_HD_V3_WGS84_1.m3fm - Result Files
	LO_HD_2018_WGS84_2	AS above + changed parameters Vert Eddy visc/vert Temp disp/ Turb and temp to higher order	yes	yes				LOnt_Enh_NW_Opt_V3_WGS84_C#.mesh	Dual: (σ - z)	LO_HD_V3_WGS84_2.m3fm - Result Files
	LO_HD_2018_WGS84_3	AS above +all inclusiv HD higher order	yes	yes				LOnt_Enh_NW_Opt_V3_WGS84_C#.mesh	Dual: (σ - z)	LO_HD_V3_WGS84_3.m3fm - Result Files
	LO_HD_2018_WGS84_4	AS _2 + all inclusive HD return to low order horizontal Smagorinsky Cs from 0.1 to 0.25	yes	yes				LOnt_Enh_NW_Opt_V3_WGS84_C#.mesh	Dual: (σ - z)	LO_HD_V3_WGS84_2.m3fm - Result Files
	LO_HD_2018_WGS84_5	AS _4 + Temp return to high order return to vert eddy visc as in _1 to 0.01 and wind coeff in Dalton’s law to 0.9 and Beer law with 0.2 and 0.4	yes	yes				LOnt_Enh_NW_Opt_V3_WGS84_C#.mesh	Dual: (σ - z)	LO_HD_V3_WGS84_2.m3fm - Result Files
	LO_HD_2018_WGS84_6	AS _4 + Temp return to high order return to vert eddy visc as in _1 to 0.01 and wind coeff in Dalton’s law to 0.9 and Beer law with 0.3 and 0.45	yes	yes				LOnt_Enh_NW_Opt_V3_WGS84_C#.mesh	Dual: (σ - z)	LO_HD_V3_WGS84_2.m3fm - Result Files
	LO_HD_2018_WGS84_7	AS _6 + vert eddy visc 0.005 from 0.01 and wind coeff in Dalton’s law to 0.8 and Beer law with 0.2 and 0.35	yes	yes				LOnt_Enh_NW_Opt_V3_WGS84_C#.mesh	Dual: (σ - z)	LO_HD_V3_WGS84_2.m3fm - Result Files
	LO_HD_2018_WGS84_8	AS _7 + vert eddy visc 0.003 from 0.005 and wind coeff in Dalton’s law to 0.8 and Beer law with 0.2 and 0.3	yes	yes				LOnt_Enh_NW_Opt_V3_WGS84_C#.mesh	Dual: (σ - z)	LO_HD_V3_WGS84_2.m3fm - Result Files
	LO_HD_2018_WGS84_9	AS _8 + vert eddy visc 0.002 from 0.003 and wind coeff in Dalton’s law to 0.78 and Beer law with 0.2 and 0.25	yes	yes				LOnt_Enh_NW_Opt_V3_WGS84_C#.mesh	Dual: (σ - z)	LO_HD_V3_WGS84_2.m3fm - Result Files
	LO_HD_2018_WGS84_10	AS _8 + vert eddy visc 0.001 from 0.002 and wind coeff in Dalton’s law to 0.77 and Beer law with 0.2 and 0.21	yes	yes				LOnt_Enh_NW_Opt_V3_WGS84_C#.mesh	Dual: (σ - z)	LO_HD_V3_WGS84_2.m3fm - Result Files
	Scenarios
	LO_NS-OS_ex_30m_2018_WGS84_AllTrac	introduced tracers (Transport Module + EcoLab + Particle module). 8 Point sources set as initial 1000 kg at 1.04 and 1.07	yes	yes				LOnt_WGS84_30m-cont_V3.mesh	Dual: (σ - z)	LO_HD_V3_WGS84_2.m3fm - Result Files
	NS-OS_ex_30m_2018_WGS84_AllTrc_NsT	As above + added 100% nearshore concentrations to the source + Low. Point sources set to normal sources because the inital sources prevented the release as they were valid only before the first time step and incresed to 100000 kg	yes	yes				LOnt_WGS84_30m-cont_V3.mesh	Dual: (σ - z)	LO_HD_V3_WGS84_2.m3fm - Result Files
	NS-30m-OS_2018_WGS84_8Trc_NsVolT	Changed Mike Ecolab Multiplication step from 1 to 2 ; Ecolab is used only to calculate age. There are 2 psssive tracers (NS Tracer April and NS Tracer July) that were released on April1 and July 1 at 8 locations.	yes	yes		yes	yes	LOnt_WGS84_30m-cont_V3.mesh	Dual: (σ - z)	LO_HD_V3_WGS84_2.m3fm - Result Files
	NS-30m_OS_2018_WGS84_Offshore-JanBC	Runs on a reduced mesh 30m-depth_LOnt_offshore_WGS84.mesh and has boundary conditions NearshoreJan.dfs0	yes	yes			yes	30m-depth_LOnt_offshore_WGS84.mesh		NS-30m_OS_2018_WGS84_Offshore-JanBC.AWS
	NS-30m_OS_2018_WGS84_Offshore-MarchBC	Runs on a reduced mesh 30m-depth_LOnt_offshore_WGS84.mesh and has boundary conditions NearshoreMarch.dfs0	yes	yes			yes	30m-depth_LOnt_offshore_WGS84.mesh		NS-30m_OS_2018_WGS84_Offshore-MarchBC.AWS
	NS-30m_OS_2018_WGS84_Offshore-JuneBC	Runs on a reduced mesh 30m-depth_LOnt_offshore_WGS84.mesh and has boundary conditions NearshoreJune.dfs0	yes	yes			yes	30m-depth_LOnt_offshore_WGS84.mesh		NS-30m_OS_2018_WGS84_Offshore-JuneBC.AWS
	NS-30m_OS_2018_WGS84_Offshore-SeptBC	Runs on a reduced mesh 30m-depth_LOnt_offshore_WGS84.mesh and has boundary conditions NearshoreSept.dfs0	yes	yes			yes	30m-depth_LOnt_offshore_WGS84.mesh		NS-30m_OS_2018_WGS84_Offshore-SeptBC.AWS
		Also, the sim time-series results will be saved once every 2 hours, (instead of every 1/2 hr), to reduce processing storage space.

## Sheet: HydroModule
								Sensitivity analysis for Lake Ontario 2008 whole-lake 3-D MIKE3 data set:
	RUN		Domain specification:			VERTICAL MESH description:											Simulation time controls:						RUN	Computer performance:					HYDRODYNAMIC MODULE:
	NUMBER		Mesh / Bathymetry	Minimum	Number of	Type of mesh:	Sigma vertical structure:				Z - level:						Start:		End:		Time (output) Interval		NUMBER	Computer	MAX time step (sec), used for:		Overall elapsed	Equivalent ratio:	Solution Technique:								Flooding and Drying:			Density of water:			HORIZONTAL Eddy Viscosity:
			input file name:	cutoff depth	Domains		Sigma	# layers	Distribution	distribution	# layers	Distribution	constant	distribution	type of	minimum	Date	Time	Date	Time	Size	Total		Used	Shallow-water	Transport	calculation time	{Simulated period /	Shallow Water Equations:					Transport Equations:			Y or N	Depth (m) used for:		Density	Reference		Eddy	Format	Constant	Data File	Data Item	Eddy Parameters (m2/s)
				(m)			depth (m)		type	set number		type	grid spacing	set number	bathymetry	layer thickness	(dd:mmm:yy)	(hh:mm)	(dd:mmm:yy)	(hh:mm)	(sec)	Number			equations	equations	(sec)	elapsed calc time}	Time Int.	Space Dist.	MIN time step	MAX time step	CFL critical	MIN time step	MAX time step	CFL critical		Drying	Wetting	Type	Temperature(oC)	Salinity(PSU)	Type		value			MIN viscosity	MAX viscosity
	LO_HD_2018_WGS84_1		LOnt_Enh_NW_Opt_V3_WGS84_C#.mesh	-2	11	Combined: σ - z	-40	16	Layer thickness	σ1	14	layer thickness		z1	advanced	2	11 Jan, 2018	00:00:00	2008-10-01	00:00:00	60	263520	LO_HD_2018_WGS84_1	96 GB/2Xeon*24 cores	60		388800		Low order	Low order	1	60	1				Y	0.005	0	fcn temp sal	10	0	Smagorinsky	constant	0.1			1.6e-06	100
	LO_HD_2018_WGS84_2		LOnt_Enh_NW_Opt_V3_WGS84_C#.mesh	-2	11	Combined: σ - z	-40	16	Layer thickness	σ1	14	layer thickness		z1	advanced	2	11 Jan, 2018	00:00:00	2008-10-01	00:00:00	60	263520	LO_HD_2018_WGS84_2	96 GB/2Xeon*24 cores	60		388800		Low order	Low order	1	60	1				Y	0.005	0	fcn temp sal	10	0	Smagorinsky	constant	0.1			1.6e-06	100
	LO_HD_2018_WGS84_3		LOnt_Enh_NW_Opt_V3_WGS84_C#.mesh	-2	11	Combined: σ - z	-40	16	Layer thickness	σ1	14	layer thickness		z1	advanced	2	11 Jan, 2018	00:00:00	2008-10-01	00:00:00	60	263520	LO_HD_2018_WGS84_3	96 GB/2Xeon*24 cores	60		388800		High order	High order	1	60	1				Y	0.005	0	fcn temp sal	10	0	Smagorinsky	constant	0.1			1.6e-06	100
	LO_HD_2018_WGS84_4		LOnt_Enh_NW_Opt_V3_WGS84_C#.mesh	-2	11	Combined: σ - z	-40	16	Layer thickness	σ1	14	layer thickness		z1	advanced	2	11 Jan, 2018	00:00:00	2008-10-01	00:00:00	30	800000	LO_HD_2018_WGS84_4	96 GB/2Xeon*24 cores	30		800000		Low order	Low order	1	30	1				Y	0.005	0	fcn temp sal	10	0	Smagorinsky	constant	0.25			1.6e-06	100
	LO_HD_2018_WGS84_5		LOnt_Enh_NW_Opt_V3_WGS84_C#.mesh	-2	11	Combined: σ - z	-40	16	Layer thickness	σ1	14	layer thickness		z1	advanced	2	11 Jan, 2018	00:00:00	2008-10-01	00:00:00	30	850000	LO_HD_2018_WGS84_5	96 GB/2Xeon*24 cores	30		850000		Low order	Low order	1	30	1				Y	0.005	0	fcn temp sal	10	0	Smagorinsky	constant	0.25			1.6e-06	100
	LO_HD_2018_WGS84_6		LOnt_Enh_NW_Opt_V3_WGS84_C#.mesh	-2	11	Combined: σ - z	-40	16	Layer thickness	σ1	14	layer thickness		z1	advanced	2	11 Jan, 2018	00:00:00	2008-10-01	00:00:00	30	850000	LO_HD_2018_WGS84_6	96 GB/2Xeon*24 cores	30		850000		Low order	Low order	1	30	1				Y	0.005	0	fcn temp sal	10	0	Smagorinsky	constant	0.25			1.6e-06	100
	LO_HD_2018_WGS84_7		LOnt_Enh_NW_Opt_V3_WGS84_C#.mesh	-2	11	Combined: σ - z	-40	16	Layer thickness	σ1	14	layer thickness		z1	advanced	2	11 Jan, 2018	00:00:00	2008-10-01	00:00:00	30	850000	LO_HD_2018_WGS84_7	96 GB/2Xeon*24 cores	30		850000		Low order	Low order	1	30	1				Y	0.005	0	fcn temp sal	10	0	Smagorinsky	constant	0.25			1.6e-06	100
	LO_HD_2018_WGS84_8		LOnt_Enh_NW_Opt_V3_WGS84_C#.mesh	-2	11	Combined: σ - z	-40	16	Layer thickness	σ1	14	layer thickness		z1	advanced	2	11 Jan, 2018	00:00:00	2008-10-01	00:00:00	30	850000	LO_HD_2018_WGS84_8	96 GB/2Xeon*24 cores	30		850000		Low order	Low order	1	30	1				Y	0.005	0	fcn temp sal	10	0	Smagorinsky	constant	0.25			1.6e-06	100
	LO_HD_2018_WGS84_9		LOnt_Enh_NW_Opt_V3_WGS84_C#.mesh	-2	11	Combined: σ - z	-40	16	Layer thickness	σ1	14	layer thickness		z1	advanced	2	11 Jan, 2018	00:00:00	2008-10-01	00:00:00	30	850000	LO_HD_2018_WGS84_9	96 GB/2Xeon*24 cores	30		850000		Low order	Low order	1	30	1				Y	0.005	0	fcn temp sal	10	0	Smagorinsky	constant	0.25			1.6e-06	100
	LO_HD_2018_WGS84_10		LOnt_Enh_NW_Opt_V3_WGS84_C#.mesh	-2	11	Combined: σ - z	-40	16	Layer thickness	σ1	14	layer thickness		z1	advanced	2	11 Jan, 2018	00:00:00	2008-10-01	00:00:00	30	850000	LO_HD_2018_WGS84_10	96 GB/2Xeon*24 cores	30		850000		Low order	Low order	1	30	1				Y	0.005	0	fcn temp sal	10	0	Smagorinsky	constant	0.25			1.6e-06	100
	SCENARIOS
	LO_NS-OS_ex_30m_2018_WGS84_AllTrac		LOnt_WGS84_30m-cont_V3.mesh	-2	11	Combined: σ - z	-40	16	Layer thickness	σ1	14	layer thickness		z1	advanced	2	11 Jan, 2018	00:00:00	2008-10-01	00:00:00	30	850000	LO_NS-OS_ex_30m_2018_WGS84_AllTrac	96 GB/2Xeon*24 cores	30		850000		Low order	Low order	1	30	1				Y	0.005	0	fcn temp sal	10	0	Smagorinsky	constant	0.25			1.6e-06	100
	NS-OS_ex_30m_2018_WGS84_AllTrc_NsT		LOnt_WGS84_30m-cont_V3.mesh	-2	11	Combined: σ - z	-40	16	Layer thickness	σ1	14	layer thickness		z1	advanced	2	11 Jan, 2018	00:00:00	2008-10-01	00:00:00	30	850000	NS-OS_ex_30m_2018_WGS84_AllTrc_NsT	96 GB/2Xeon*24 cores	30		850000		Low order	Low order	1	30	1				Y	0.005	0	fcn temp sal	10	0	Smagorinsky	constant	0.25			1.6e-06	100
	NS-30m-OS_2018_WGS84_8Trc_NsVolT		LOnt_WGS84_30m-cont_V3.mesh	-2	11	Combined: σ - z	-40	16	Layer thickness	σ1	14	layer thickness		z1	advanced	2	11 Jan, 2018	00:00:00	2008-10-01	00:00:00	30	850000	NS-30m-OS_2018_WGS84_8Trc_NsVolT	96 GB/2Xeon*24 cores	30		850000		Low order	Low order	1	30	1				Y	0.005	0	fcn temp sal	10	0	Smagorinsky	constant	0.25			1.6e-06	100
	NS-30m_OS_2018_WGS84_Offshore-JanBC		30m-depth_LOnt_offshore_WGS84.mesh	-2	11	Combined: σ - z	-40	16	Layer thickness	σ1	14	layer thickness		z1	advanced	2	11 Jan, 2018	00:00:00	2008-10-01	00:00:00	30	850000	NS-30m_OS_2018_WGS84_Offshore-JanBC	96 GB/2Xeon*24 cores	30		850000		Low order	Low order	1	30	1				Y	0.005	0	fcn temp sal	10	0	Smagorinsky	constant	0.25			1.6e-06	100
	NS-30m_OS_2018_WGS84_Offshore-MarchBC		30m-depth_LOnt_offshore_WGS84.mesh	-2	11	Combined: σ - z	-40	16	Layer thickness	σ1	14	layer thickness		z1	advanced	2	11 Jan, 2018	00:00:00	2008-10-01	00:00:00	30	850000	NS-30m_OS_2018_WGS84_Offshore-MarchBC	96 GB/2Xeon*24 cores	30		850000		Low order	Low order	1	30	1				Y	0.005	0	fcn temp sal	10	0	Smagorinsky	constant	0.25			1.6e-06	100
	NS-30m_OS_2018_WGS84_Offshore-JuneBC		30m-depth_LOnt_offshore_WGS84.mesh	-2	11	Combined: σ - z	-40	16	Layer thickness	σ1	14	layer thickness		z1	advanced	2	11 Jan, 2018	00:00:00	2008-10-01	00:00:00	30	850000	NS-30m_OS_2018_WGS84_Offshore-JuneBC	96 GB/2Xeon*24 cores	30		850000		Low order	Low order	1	30	1				Y	0.005	0	fcn temp sal	10	0	Smagorinsky	constant	0.25			1.6e-06	100
	NS-30m_OS_2018_WGS84_Offshore-SeptBC		30m-depth_LOnt_offshore_WGS84.mesh	-2	11	Combined: σ - z	-40	16	Layer thickness	σ1	14	layer thickness		z1	advanced	2	11 Jan, 2018	00:00:00	2008-10-01	00:00:00	30	850000	NS-30m_OS_2018_WGS84_Offshore-SeptBC	96 GB/2Xeon*24 cores	30		850000		Low order	Low order	1	30	1				Y	0.005	0	fcn temp sal	10	0	Smagorinsky	constant	0.25			1.6e-06	100
[truncated: 92 more columns]

## Sheet: Waves
	Simulation	Comments	Basic eq	Spectral discretization	Water level conditions	Current conditions	Wind Forcing	Ice Coverage	Diffraction	Energy transfer	Wave breaking	Bottom Friction	White capping	Initial Conditions	Boundary Conditions
	LO_SW_WGS84_2018-1	Time step 60 s	full spectral	Minf=0.06, #f=30	from HD	from HD	same as HD	No	No	Quad:yes; Triad:no	Func form: Ruesnsnik: alpha:1	AS above + changed the vertical layers from 12 to 14 and gradual height change at both ends + feb01 to 31dec. Added Lynde , Petticoat, Wilmot and Deer Creeks in Sources		Jonaswap fetch: Max Peak: 0.95	All closed

## Sheet: DataSets
	Detailed Data Sets for Hydrodynamic Module:
					WIND / ATM PRESSURE INPUT FILES:		(All use "anistropic inverse distance weighing" interpolation using met station data)
	Combined σ - z VERTICAL LAYER DISTRIBUTIONs:				File Name	Sub-directory location	Time period of values:	Frequency of	Stations excluded:	Total stns	Interpolation values:				Ratio: Vlake/Vmet
						in C:\DataPrep\Wind:		data:		used:	δ	β	ρ	Θ	yes / no	Description:
	(a) σ layer configuration:
					UVP_LO1992.dfs2	Case1	1 Jan 1992 00:00 to 1 Jan 1993 00:00	hourly	None	8	0	2	1	13	no
	Dist Set #	distribution type	# layers: thickness (% of total water column depth OR water column thickness: surf to z-layer top)		UVP_LO200610.dfs2	Case1	1 Jan 2006 00:00 to 1 Jan 2011 00:00	hourly	None	16	0	2	1	13	no
	σ2	"layer thickness"	16 Layers: 3, 5, 7, 7, 7, 7, 7, 7, 7, 7, 7, 7, 7, 7, 5, 3		UVP_LO1992_C2.dfs2	Case2	1 Jan 1992 00:00 to 1 Jan 1993 00:00	hourly	Pearson, Hamilton	6	40000	2	1	13	no
					UVP_LO200610_C2.dfs2	Case2	1 Jan 2006 00:00 to 1 Jan 2011 00:00	hourly	Pearson, Hamilton	14	40000	2	1	13	no
					UVP_LO1992_LLR01.dfs2	Case3	1 Jan 1992 00:00 to 1 Jan 1993 00:00	hourly	Pearson, Hamilton	6	40000	2	1	13	yes	Seasonally increased from 10 to 70%; using sinusoidal equation; within: "Wind_V/UComp_AllStns_LLR01_1992.xls"
	(b) z layer configuration:				UVP_LO200610_LLR01.dfs2	Case3	1 Jan 2006 00:00 to 1 Jan 2011 00:00	hourly	Pearson, Hamilton	14	40000	2	1	13	yes	Seasonally increased from 10 to 70%; using sinusoidal equation; within: "Wind_V/UComp_AllStns_LLR01_20062011.xls"
	Dist Set #	distribution type	# layers: thickness of layers (meters), with Layer 1 closest to the bottom		UVP_LO2008_LLR02.dfs2	Case4	1 Jan 2008 00:00 to 31 Dec 2008 23:00	hourly	Pearson, Hamilton	14	40000	2	1	13	yes	Uniformly increased by 20%; within: "Wind_V/UComp_AllStns_LLR02_20062011.xls"
	z2	"layer thickness"	12 Layers: 2, 4, 8, 10, 12, 16, 20, 25, 25, 25, 25, 25
					UVP_LO2008_LLR02_C1.dfs2	Case5	1 Jan 2008 00:00 to 31 Dec 2008 23:00	hourly	None	16	0	2	1	13	yes	Uniformly increased by 20%; within: "Wind_V/UComp_AllStns_LLR02_20062011.xls"
					UVP_LO1992_LLR02_C1.dfs2	Case5	1 Jan 1992 00:00 to 1 Jan 1993 00:00	hourly	None	8	0	2	1	13	yes	Uniformly increased by 20%; within: "Wind_V/UComp_AllStns_LLR02_20062011.xls"
					UVP_LOJJ1996_LLR02.dfs2		1 Jan 1996 00:00 to 30 Jun 1996 00:00	hourly	None	13	0	2	1	13	yes	Uniformly increased by 20%; within: "Wind_V/UComp_AllStns_LLR02_1996.xls"
					UVP_LOJJ1996_LLR03.dfs2		1 Jan 1996 00:00 to 30 Jun 1996 00:00	hourly	None	13	0	2	1	13	yes	Uniformly decreased by 20%; within: "Wind_V/UComp_AllStns_LLR03_1996.xls"
	SOURCES:				UVP_LOJJ1996_C2.dfs2		1 Jan 1996 00:00 to 30 Jun 1996 00:00	hourly	Pearson, Hamilton	11	40000	2	1	13	no
	(a) Hydrodynamic Module Sources:		Data Set Name:
			Whole-lake 1
	Source		Nature / description	Input File
	1	DNGS intake north	Simple Source, CONSTANT, at: -100 cms; (at the bottom of the Sigma layer section - Layer 15)	67 m^3/s
		DNGS intake middle	Simple Source, CONSTANT, at: -100 cms; (at the bottom of the Sigma layer section - Layer 15)	66 m^3/s
		DNGS intake south	Simple Source, CONSTANT, at: -100 cms; (at the bottom of the Sigma layer section - Layer 15)	67 m^3/s
	2	DNGS outfall diffuser - north end	Simple Source, CONSTANT, at: 33 cms; (at the bottom of the Sigma layer section - Layer 26)	u=v=0 m/s
	3	DNGS outfall diffuser - middle	Simple Source, CONSTANT, at: 34 cms; (at the bottom of the Sigma layer section - Layer 26)	u=v=0 m/s
	4	DNGS outfall diffuser - south end	Simple Source, CONSTANT, at: 33 cms; (at the bottom of the Sigma layer section - Layer 26)	u=v=0 m/s
	5	PNGS intake Unit A	Specified discharge - CONSTANT at: -100 cms	100 m^3/s
	6	PNGS intake Unit B	Specified discharge - CONSTANT at: -100 cms	100 m^3/s
	7	PNGS Unit A outfall channel	Specified discharge - CONSTANT at: 50 cms	u=-0.2 v=-0.1 m/s
	8	PNGS Unit B outfall channel	Specified discharge - CONSTANT at: 50 cms	u=0.1 v=-0.2 m/s
	(b) Transport Module Sources:		Data Set Name:
			Whole-lake 1
	Source		Nature / description	Input File
			Specified concentration, constant (1,000,000)
			Specified concentration, constant (1,000,000)
			Specified concentration, constant (1,000,000)
			Specified concentration, constant (1,000,000)
			Specified concentration, constant (1,000,000)
			Specified concentration, constant (1,000,000)
	BOUNDARY CONDITIONS and SOURCES
	(a) Hydrodynamic Module BCs:		Data Set Name:
			Whole-lake 1
	Source/Boundary:
	Number:	Name:	Nature / description	Input File	Type
	1	Welland Canal	Specified discharge - varying in time - DAILY AVE	WellandCanal_Q2013.dfs0	BC
	2	Niagara River	Specified discharge - varying in time - DAILY AVE	NiagaraR_Q2013.dfs0	BC
	3	St. Lawrence River - North (of Wolfe Island)	Specified discharge - varying in time - DAILY AVE	StLawrenceRNorth_Q2013.dfs0	BC
	4	St. Lawrence River - South (of Wolfe Island)	Specified discharge - varying in time - DAILY AVE	StLawrenceRSouth_Q2013.dfs0	BC
	5	Twelve Mile Creek	Specified discharge - varying in time - DAILY AVE	TwentyMileC_Q2013.dfs0	Source
	6	Fifteen Mile Creek	Specified discharge - CONSTANT at: 0 m^3/s	N/A	Source
	7	Twenty Mile Creek	Specified discharge - varying in time - DAILY AVE	TwentyMileC_Q2013.dfs0	Source
	8	Redhill Creek	Specified discharge - varying in time - DAILY AVE	RedHillC_Q2013.dfs0	Source
	9	Bronte Creek	Specified discharge - varying in time - DAILY AVE	BronteC_Q2013.dfs0	Source
	10	Fourteen Mile Creek	Specified discharge - varying in time - DAILY AVE	FourteenMileC_Q2013.dfs0	Source
	11	Sixteen Mile Creek	Specified discharge - varying in time - DAILY AVE	SixteenMileC_Q2013.dfs0	Source
	12	Credit River	Specified discharge - varying in time - DAILY AVE	CreditR_Q2013.dfs0	Source
	13	Etobicoke Creek	Specified discharge - varying in time - DAILY AVE	EtobicokeC_Q2013.dfs0	Source
	14	Don River	Specified discharge - varying in time - DAILY AVE	DonR_Q2013.dfs0	Source
	15	Highland Creek	Specified discharge - varying in time - DAILY AVE	HighlandC_Q2013.dfs0	Source
	16	Rouge River	Specified discharge - varying in time - DAILY AVE	RougeR_Q2013.dfs0	Source
	17	Duffins Creek	Specified discharge - varying in time - DAILY AVE	DuffinsC_Q2013.dfs0	Source
	18	Bowmanville Creek	Specified discharge - varying in time - DAILY AVE	BowmanvilleC_Q2013.dfs0	Source
	19	Ganaraska River	Specified discharge - varying in time - DAILY AVE	GanaraskaR_Q2013.dfs0	Source
	20	Trent River	Specified discharge - varying in time - DAILY AVE	TrentR_Q2013.dfs0	Source
	21	Moira River	Specified discharge - varying in time - DAILY AVE	MoiraR_Q2013.dfs0	Source
	22	Little Catarauqui Creek	Specified discharge - varying in time - DAILY AVE	LittleCatarauquiC_Q2013.dfs0	Source
	23	Black River, NY	Specified discharge - varying in time - DAILY AVE	BlackR_Q2013.dfs0	Source
	24	Salmon River, NY	Specified discharge - varying in time - DAILY AVE	SalmonR_Q2013.dfs0	Source
	25	Oswego River, NY	Specified discharge - varying in time - DAILY AVE	OswegoR_Q2013.dfs0	Source
	26	Irondequoit Creek, NY	Specified discharge - varying in time - DAILY AVE	IrondequoitC_Q2013.dfs0	Source
	27	Genesee River, NY	Specified discharge - varying in time - DAILY AVE	GeneseeR_Q2013.dfs0	Source
	28	Oak Orchard Creek, NY	Specified discharge - varying in time - DAILY AVE	OakOrchardC_Q2013.dfs0	Source
	29	Eighteen Mile Creek, NY	Specified discharge - varying in time - DAILY AVE	EighteenMileC_Q2013.dfs0	Source
	30	Sandy Creek NY	Specified discharge - varying in time - DAILY AVE	SandyC_Q2013.dfs0	Source
	31	Pringle Creek ON	Specified discharge - varying in time - DAILY AVE	PringleCr_Flow-rate_2013daily.dfs0	Source
	32	Humber River	Specified discharge - varying in time - DAILY AVE	HumberR_Q2013.dfs0	Source
	33	Mimico Creek	Specified discharge - varying in time - DAILY AVE	MimicoC_Q2013.dfs0	Source
	34	Lynde Creek	Specified discharge - varying in time - DAILY AVE	LyndeCr.dfs0
	35	Deer Creek	Specified discharge - varying in time - DAILY AVE	DeerCr.dfs0
	36	Petticoat Creek	Specified discharge - varying in time - DAILY AVE	PetticoatCr.dfs0
	37	Wilmot Creek	Specified discharge - varying in time - DAILY AVE	WilmotCr.dfs0
	38	Sterling Creek, NY	Specified discharge - varying in time - DAILY AVE	SterlingCrNY-2018.dfs0
	39	Soduls Creek, NY	Specified discharge - varying in time - DAILY AVE	SodusCrNY.dfs0
	40	Northup Creek, NY	Specified discharge - varying in time - DAILY AVE	NorthrupCrNY.dfs0
	41	Sandy Creek, North Hamilton	Specified discharge - varying in time - DAILY AVE	SandyCrNHamlinNY.dfs0
	42	Oshawa Creek	Specified discharge - varying in time - DAILY AVE	OshawaCr.dfs0
	43	Humber STP	Specified discharge - CONSTANT at: 0.4 m^3/s
	44	LakeView WPCP	Specified discharge - CONSTANT at: 0.24 m^3/s
	TEMPERATURE / SALINITY MODULE:
			Data Set Name:
			Whole-lake 1
			Nature / description	Input File
	1	Welland Canal	Specified temperature - varying in time - DAILY AVE	NiagaraR_T2013.dfs0
	2	Niagara River	Specified temperature - varying in time - DAILY AVE	NiagaraR_T2013.dfs0
	3	St. Lawrence River - North (of Wolfe Island)	Specified temperature - varying in time - DAILY AVE	StLawrenceR_T2013.dfs0
	4	St. Lawrence River - South (of Wolfe Island)	Specified temperature - varying in time - DAILY AVE	StLawrenceR_T2013.dfs0
	5	DGNSIntake_North	excess temperature: constant 0C
	6	DGNSOut_North	excess temperature: constant 10C
	7	DGNSOut_Mid	excess temperature: constant 10C
	8	DGNSOut_South	excess temperature: constant 10C
	9	DGNSIntake_Mid	excess temperature: constant 0C
	10	DGNSIntake_South	excess temperature: constant 0C
	11	PNGSIntake_UnitA	excess temperature: constant 0C
	12	PNGSIntake_UnitB	excess temperature: constant 0C
	13	PNGSOut_UnitA	excess temperature: constant 10C
	14	PNGSOut_UnitB	excess temperature: constant 10C
	5	Twelve Mile Creek	Specified temperature - varying in time - DAILY AVE	IFYGL_Runoff_T.dfs0
	6	Fifteen Mile Creek	Specified temperature - varying in time - DAILY AVE	IFYGL_Runoff_T.dfs0
	7	Twenty Mile Creek	Specified temperature - varying in time - DAILY AVE	IFYGL_Runoff_T.dfs0
	8	Redhill Creek	Specified temperature - varying in time - DAILY AVE	IFYGL_Runoff_T.dfs0
	9	Bronte Creek	Specified temperature - varying in time - DAILY AVE	IFYGL_Runoff_T.dfs0
	10	Fourteen Mile Creek	Specified temperature - varying in time - DAILY AVE	IFYGL_Runoff_T.dfs0
	11	Sixteen Mile Creek	Specified temperature - varying in time - DAILY AVE	IFYGL_Runoff_T.dfs0
	12	Credit River	Specified temperature - varying in time - DAILY AVE	CreditR_WaterTemp_2013Hourly.dfs0
	13	Etobicoke Creek	Specified temperature - varying in time - DAILY AVE	CooksvilleCr_WaterTemp_2013Hourly.dfs0
	14	Don River	Specified temperature - varying in time - DAILY AVE	DonR_WaterTemp_2013Hourly.dfs0
	15	Highland Creek	Specified temperature - varying in time - DAILY AVE	CooksvilleCr_WaterTemp_2013Hourly.dfs0
	16	Rouge River	Specified temperature - varying in time - DAILY AVE	DonR_WaterTemp_2013Hourly.dfs0
	17	Duffins Creek	Specified temperature - varying in time - DAILY AVE	IFYGL_Runoff_T.dfs0
	18	Bowmanville Creek	Specified temperature - varying in time - DAILY AVE	IFYGL_Runoff_T.dfs0
	19	Ganaraska River	Specified temperature - varying in time - DAILY AVE	IFYGL_Runoff_T.dfs0
	20	Trent River	Specified temperature - varying in time - DAILY AVE	TrentRiver_WaterTemp_2013Daily.dfs0
	21	Moira River	Specified temperature - varying in time - DAILY AVE	IFYGL_Runoff_T.dfs0
	22	Little Catarauqui Creek	Specified temperature - varying in time - DAILY AVE	IFYGL_Runoff_T.dfs0
	23	Black River, NY	Specified temperature - varying in time - DAILY AVE	IFYGL_Runoff_T.dfs0
	24	Salmon River, NY	Specified temperature - varying in time - DAILY AVE	IFYGL_Runoff_T.dfs0
	25	Oswego River, NY	Specified temperature - varying in time - DAILY AVE	IFYGL_Runoff_T.dfs0
	26	Irondequoit Creek, NY	Specified temperature - varying in time - DAILY AVE	IrondequoitC_T2013.dfs0
	27	Genesee River, NY	Specified temperature - varying in time - DAILY AVE	IrondequoitC_T2013.dfs0
	28	Oak Orchard Creek, NY	Specified temperature - varying in time - DAILY AVE	IrondequoitC_T2013.dfs0
	29	Eighteen Mile Creek, NY	Specified temperature - varying in time - DAILY AVE	IrondequoitC_T2013.dfs0
	30	Sandy Creek NY	Specified temperature - varying in time - DAILY AVE	IFYGL_Runoff_T.dfs0
	31	Pringle Creek ON	Specified temperature - varying in time - DAILY AVE	IFYGL_Runoff_T.dfs0
	32	Humber River	Specified temperature - varying in time - DAILY AVE	HumberR_WaterTemp_2013Hourly.dfs0
	33	Mimico Creek	Specified temperature - varying in time - DAILY AVE	CooksvilleCr_WaterTemp_2013Hourly.dfs0
	34	Lynde Creek	Specified temperature - varying in time - DAILY AVE	Temperature_LyndeCr.dfs0
	35	Deer Creek	Specified temperature - varying in time - DAILY AVE	Temperature_LyndeCr.dfs0
	36	Petticoat Creek	Specified temperature - varying in time - DAILY AVE	Temperature_LyndeCr.dfs0
	37	Wilmot Creek	Specified temperature - varying in time - DAILY AVE	Temperature_LyndeCr.dfs0
	38	Sterling Creek, NY	Specified temperature - varying in time - DAILY AVE	IrondequoitCrNY.dfs0
	39	Soduls Creek, NY	Specified temperature - varying in time - DAILY AVE	IrondequoitCrNY.dfs0
	40	Northup Creek, NY	Specified temperature - varying in time - DAILY AVE	NorthrupCrNY.dfs0
	41	Sandy Creek, North Hamilton	Specified temperature - varying in time - DAILY AVE	GeneseeRivNY.dfs0
	42	Oshawa Creek	Specified temperature - varying in time - DAILY AVE	Temperature_LyndeCr.dfs0
	43	Humber STP	excess temperature: constant 10C
	44	LakeView WPCP	excess temperature: constant 10C
	k-Є TURBULENCE MODULE
	Initial Conditions:
			Data Set Name:
			Whole-lake 1:
		Turbulent kinetic energy:	Constant; 1e-7 m2/s2
		Dissipation of turbulent kinetic energy:	Constant; 5e-10 m2/s3
	Boundary Conditions:
			Data Set Name:
			Whole-lake 1:
		Turbulent kinetic energy:
	All
		all BCs are the same	Specified values, constant; 1e-7 m2/s2
		Dissipation of turbulent kinetic energy:
	All
		all BCs are the same	Specified values, constant; 5e-10 m2/s3
	SPECTRAL WAVES MODULE
	Sources:
			Nature / description	Input File	Type
		Spectral formulation:	Fully spectral formulation
		Time formulation	Instationary formulation
		Frequency discretization	discretization type: logarithmic
			number of frequencies : 16
			minim frequencies 0.055 Hz
			frequency factor: 1.1
		Directional Discretization	Discretization type: 360 degree rose
			Number of directions: 16
		Separation of wind sea and swell	Type of separation: No separatip
		Wind forcing	varying in time and domain	Meteorology\UVP_LOnt2013.dfs2
			Charnock parameter 0.01
		Ice coverage	No ice coverage
		diffraction	Smoothing factor: 1 Number of smooting steps: 1
		Energy transfer	Include quadruplet wave interaction x; Include triad wave interaction x;
		Wave Breaking	Model: wave breaking; Type of Gamma: Functinal form (Ruessink et al 2003)
			Alpha : 1
		Bottom Friction	Nikuradse roughness, kn
			Nikuradse roughness data: Format: constant; Constant Value: 0.04
		White capping	White capping;
			Dissipation coefficient Cdis, data: Format constant; Constant value: 2
			Dissipation coefficient, DELTA, dis, data: Format: constant; constant value; 0.8
			Power for mean anguar frequency : -1
			Power for mean wave number: -1
		Structures	none
		Boundary conditions	all: closed boundary
	MUD TRANSPORT MODULE
		Parameter selection	Number of fractions 1
			Number of layers 1
		Water column parameters	Sand fractions: not included
			Settling: include floculation; concentration for floculation: 0.01;
			density of sed: 2650; conce for hindering settling: 10
			Fraction 1: settling velocity coeff: Constant Value: 3.3 e-06
			Deposition: Deposition params: Apply Teeter Profile
			Fraction 1: Format : constant; Constant value 0.000104
			Viscosity and density
			Viscosity feedback onHD: checked
			Density of suspended Sediment : 2650 kg /m^3
			Base in Viscosity Formula: 1
			Concentration in Viscosity Formula
		Bed Parameters
			Erosion->Layer1: Hard mud
			Power of erosion:1 (soft mud is 8.3 and it is too high)
			Erosion Coefficient: 0.00005 [kg/m^2/s]
			Critical shear stress: 0.1 N/m^2
			Density of bed layer- Layer 1
			Constant: value : [500 kg/m^3]
			Ber roughness
			Format: constant
			value: 0.02 [m]
		Forcings
			Waves -> From SW simulation
			Mean (Soulsby et al 1993)
		Dredging	No dredging
		Dipersion	Horizontal
			Formulation:Scaled eddy viscosity formulation
			Format: Constant Value: 0.1
			Vertical
			Formulation:Scaled eddy viscosity formulation
			Format: Constant Value: 0.03
		Sources	All zero contribution
		Initial Conditions
			Fraction 1 : 0.1 kg/m^3
			Layer thickness: 0.5 m
			Fraction distribution: 100 %
		Boundary Conditions
			weeland 0.0001
			niagara river 0.001
			StLawrence riv N zero gradient
			St Lawrence River S zero gradient
		Morphoology	No
